# THE AMERICAN JOURNAL OF PSYCHIATRY

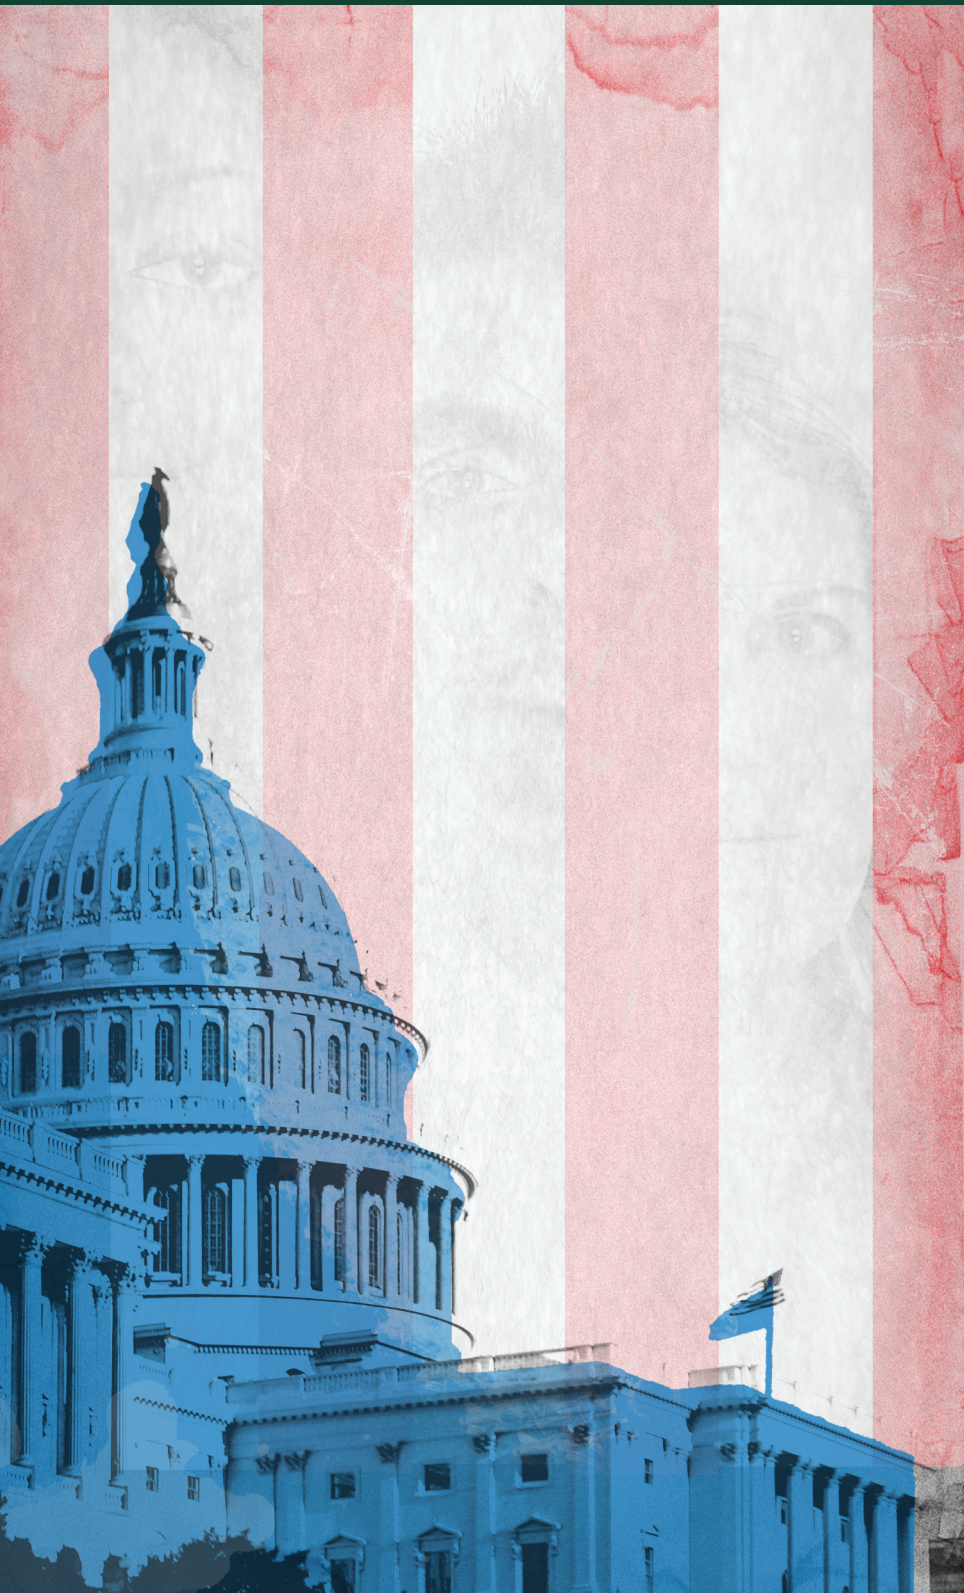

## Should Attenuated Psychosis Syndrome Be a DSM-5 Diagnosis?

William T. Carpenter, M.D.,  
and Jim van Os, Ph.D.

460

## ◀ The Impact of National Health Care Reform on Adults With Severe Mental Disorders

Rachel L. Garfield, Ph.D., et al.

486

## Deep Brain Stimulation for Treatment-Resistant Depression: Follow-Up After 3 to 6 Years

Sidney H. Kennedy, M.D., et al.

502

## Association of Cerebrovascular Events With Antidepressant Use: A Case-Crossover Study

Chi-Shin Wu, M.D., M.Sc., et al.

511

## Continuing Medical Education

559

May 2011

Volume 168 • Number 5

Official Journal of the  
AMERICAN PSYCHIATRIC ASSOCIATION

[ajp.psychiatryonline.org](http://ajp.psychiatryonline.org)
