# The Residents' JOURNAL

The Residents' JOURNAL  
a publication of  
The American Journal of Psychiatry

April 2011      Volume 6      Issue 4

**Inside**

- 1 In This Issue
- 2 **Ethics and The Residents' Journal**  
Joseph M. Cerimele, M.D.
- 3 **Early Intervention for Schizophrenia, Part 1: A Review**  
Karthik Sivashanker, M.D.
- 6 **Schizophrenia Associated With Prenatal Exposure to Dutch and Chinese Famines**  
Kristen C. Ochoa, M.D.
- 9 **Treatment of PTSD With Alpha-Adrenergic Blocking Agents**  
Nirupama Natarajan, M.D.
- 11 **A Case of Anorexia**  
Rupinder Kaur Legha, M.D.
- 13 **Wernicke-Korsakoff Syndrome Developing after Bariatric Surgery**  
Crystal Thomas, M.D.;  
Vincent Caringi, M.D.;  
Joseph Locala, M.D.
- 15 **Demoralization**  
Amit Pradhan, M.D.
- 16 **Letter to the Editor**
- 17 **Test Your Knowledge**
- 18 **Residents' Journal Info**

**In This Issue**



This issue of *The Residents' Journal* features articles on psychosomatic medicine. In a case report, Rupinder Kaur Legha, M.D., discusses how both cognitive- and dialectical-behavioral therapy can be efficacious in the treatment of anorexia nervosa. Next, Amit Pradhan, M.D., demonstrates how psychotherapeutic intervention can be used to manage symptoms of demoralization in hospitalized patients.

Editor-in-Chief  
Joseph M. Cerimele, M.D.

Associate Editor  
Sarah M. Foyad, M.D.

Editors Emeriti  
Sarah B. Johnson, M.D.  
Molly McVay, M.D.

Guest Section Editor  
Amit Pradhan, M.D.

Staff Editor  
Angela Moore

The Residents' Journal accepts manuscripts authored by medical students, resident physicians, and fellows. To submit your paper, please visit the manuscript submission site at [mc.manuscriptcentral.com/appi-ajp](http://mc.manuscriptcentral.com/appi-ajp) and either create an account or use your existing account. For manuscript type, select "Residents." Then follow the instructions to upload your manuscript. Residents who are interested in participating as Guest Section Editors should e-mail the Residents' Journal Editor-in-Chief Joseph Cerimele at [joseph.cerimele@mssm.edu](mailto:joseph.cerimele@mssm.edu).

See the September 2010 issue for details on the new peer review process.

The Residents' Journal is sent free-of-charge to all psychiatry residents. Anyone interested in being included on the distribution list should contact Angela Moore, the Residents' Journal staff editor at [ajp@psych.org](mailto:ajp@psych.org) with "Subscribe to Residents' Journal" in the subject line.

**Upcoming Issue Themes**  
May: Child Psychiatry

# get CME from AJP

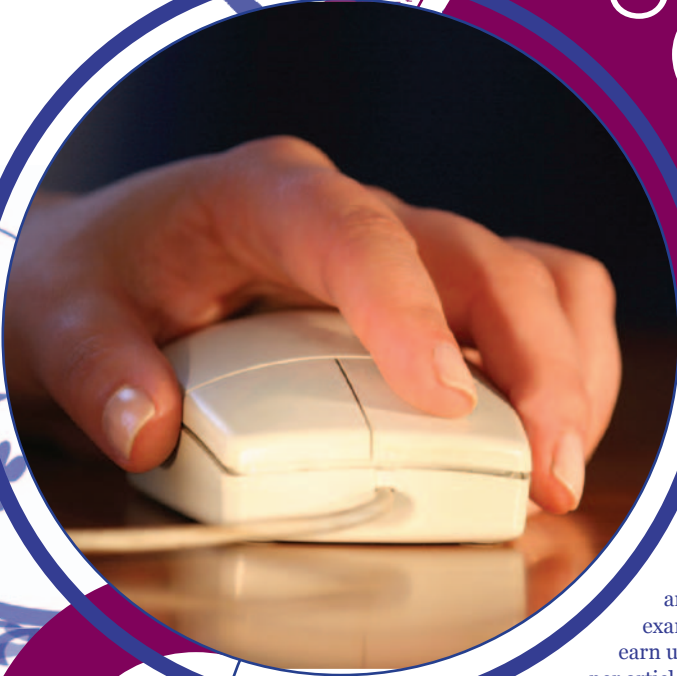

Brief companion exams are created for three of the most influential articles from each issue. By reading the articles and completing the online exams, you can test your knowledge and earn up to 1 *AMA PRA Category 1 Credit™* per article. Correct answers are highlighted for your reference upon completion of the course; there is no minimum threshold score necessary for the credit. A

link from the question to the correct answer in context will also be highlighted in the associated article, thus extending the learning experience.

CME credit is only provided online, and a subscription to the AJP CME program is required. From the moment you subscribe to the AJP CME program, you will be able to select from 72 courses from among 40 possible subject areas. You'll also be able to access the next 33 courses as they become available. For more information and pricing, please go to <http://cme.psychiatryonline.org/misc/aboutajpcme.shtml>

This activity is sponsored by the American Psychiatric Association. The American Psychiatric Association is accredited by the Accreditation Council for Continuing Medical Education to provide continuing medical education for physicians. The American Psychiatric Association designates each educational activity for a maximum of 1 *AMA PRA Category 1 Credit™*. Physicians should only claim credit commensurate with the extent of their participation in the activity.

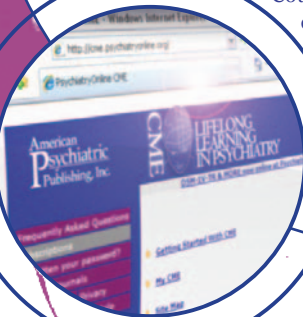

Fulfill your CME requirement while staying current on the latest advances in psychiatry.  
Subscribe to AJP CME!

# The American Journal of PSYCHIATRY

Latest  
IMPACT  
FACTOR  
12.52!

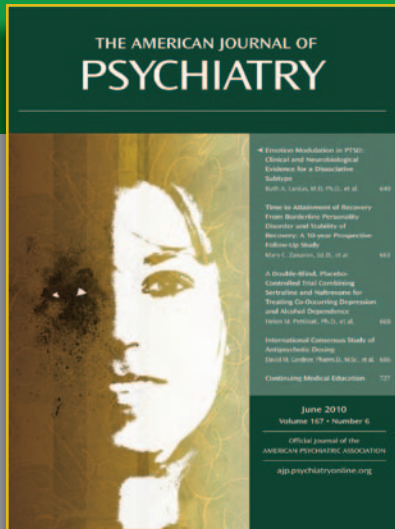

Official Journal of the  
American Psychiatric Association

Edited by Robert Freedman, M.D.

- AJP saw its 2009 Impact Factor rise almost two full points point to reach 12.52, placing it 2nd among the 117 psychiatry journals indexed, while still remaining the far-and-away leader in total citations.
- According to the May 2010 Thomson Scientific Essential Science Indicators, five of the Top 44 most highly cited articles in psychiatry/psychology appeared in *The American Journal of Psychiatry*. No other journal had more!
- *The American Journal of Psychiatry* (AJP) is again the #1 journal in psychiatry in terms of immediacy according to Thomson Scientific's Immediacy Index. This important performance metric is calculated by dividing the number of citations to articles published in a given year by the number of articles published in that year.
- The Immediacy Index is a good measure of how quickly a given journal's articles are cited—AJP's #1 placement is a result of publishing articles that are relevant, covering current "hot" topics and cutting-edge research, and getting these findings to the field faster with AJP in Advance, the Journal's online-ahead-of-print publication protocol.
- A recent poll conducted by the BioMedical & Life Sciences Division of The Special Libraries Association identified the 100 most influential journals in all of Biology & Medicine over the last 100 years. *The American Journal of Psychiatry* was among those honored, the only psychiatry/psychology journal represented.

No other psychiatric journal reaches more psychiatrists with greater impact or immediacy than the journal that the overwhelming majority of psychiatrist considers essential: AJP.

ISSN 0002-953X

[ajp.psychiatryonline.org](http://ajp.psychiatryonline.org)

To order a subscription, visit

[www.appi.org](http://www.appi.org).

American  
Psychiatric  
Publishing, Inc.

The First and Last Word in Psychiatry

American Psychiatric Publishing

[www.appi.org](http://www.appi.org) • 1-800-368-5777 • 703-907-7322

Find us on [facebook](#) and [twitter](#) Priority Code AH1036



## Contents

- A15 Editorial Board  
A17 Highlights of this issue

## Editorials

- 333 Has psychopharmacology got a future?  
P. J. Cowen

- 335 Shrink-wrapped asylum – psychiatry in pictures  
Jeff Clarke

- 336 More good news about the magic ion: lithium may prevent dementia  
A. H. Young

- 338 Keeping therapies simple: psychoeducation in the prevention of relapse in affective disorders  
F. Colom

## Review article

- 341 Clinical relevance of findings in trials of antipsychotics: systematic review.  
P. Lepping, R. S. Sambhi, R. Whittington, S. Lane and R. Poole

## Papers

- 346 Lithium in drinking water and suicide mortality  
N. D. Kapusta, N. Mossaheb, E. Etzersdorfer, G. Hlavin, K. Thau, M. Willeit, N. Praszak-Rieder, G. Sonneck and K. Leithner-Dziubas

- 351 Disease-modifying properties of long-term lithium treatment for amnesic mild cognitive impairment: randomised controlled trial  
O. V. Forlenza, B. S. Diniz, M. Radanovic, F. S. Santos, L. L. Talli and W. F. Gattaz

- 357 Annual high-dose vitamin D<sub>3</sub> and mental well-being: randomised controlled trial  
K. M. Sanders, A. L. Stuart, E. J. Williamson, F. N. Jacka, S. Dodd, G. Nicholson and M. Berk

- 364 Projective identification – 100 words  
Jeremy Holmes

- 365 Neuroanatomical profiles of personality change in frontotemporal lobar degeneration  
C. J. Mahoney, J. D. Rohrer, R. Omar, M. N. Rossor and J. D. Warren

- 373 Previous prenatal loss as a predictor of perinatal depression and anxiety  
E. Robertson Blackmore, D. Côté-Arsenault, W. Tang, V. Glover, J. Evans, J. Golding and T. G. O'Connor

- 378 Melancholia in *Chahâr Maqâle*, a 12th-century Persian text – extra  
Neil Aggarwal

- 379 Impact of screening for risk of suicide: randomised controlled trial  
M. J. Crawford, L. Thana, C. Methuen, P. Ghosh, S. V. Stanley, J. Ross, F. Gordon, G. Blair and P. Bajaj

- 384 King David: an episode of acute stress disorder during the brief life and premature death of Bathsheba's baby – psychiatry in the Old Testament  
George Stein

- 385 Family psychoeducation for major depression: randomised controlled trial  
K. Shimazu, S. Shimodera, Y. Mino, A. Nishida, N. Kamimura, K. Sawada, H. Fujita, T. A. Furukawa and S. Inoue

- 391 Stepped care and cognitive-behavioural therapy for bulimia nervosa: randomised trial  
J. E. Mitchell, S. Agras, S. Crow, K. Halmi, C. G. Fairburn, S. Bryson and H. Kraemer

- 398 Working memory task performance and chunking in early Alzheimer's disease  
J. Huntley, D. Bor, A. Hampshire, A. Owen and R. Howard

## Short reports

- 404 Season of birth and anorexia nervosa  
G. Disanto, A. E. Handel, A. E. Para, S. V. Ramagopalan and L. Handunnetthi

- 406 Lithium in drinking water and suicide rates across the East of England  
N. Kabacs, A. Memon, T. Obinwa, J. Stochl and J. Perez

## Columns

- 408 Correspondence  
410 Corrections  
411 Book reviews  
414 Contents of *Advances in Psychiatric Treatment*  
415 Contents of the *American Journal of Psychiatry*  
416 From the Editor's desk

## Cover picture

*The Drinker* (1964), Fred Page (1908–1984)

Fred Page was born in Utrecht, in South Africa, but is mainly remembered as a Port Elizabeth artist. This painting is autobiographical and the artist depicts himself as a down-and-out alcoholic. He portrays poignantly the despair of a dishevelled drinker. He sips his drink quietly with his shoes on the wrong feet, impossibly baggy trousers and elongated limbs. Page's very striking, mainly black and white paintings have a quality reminiscent of Giorgio de Chirico (1888–1978), the Italian metaphysical painter, with their eerie visions of empty buildings, long shadows and bleak harshly lit landscapes.

This painting, from a White artist, seems to pass judgement on the ravaged apartheid society of which he was a part. The background shows an empty fortress-like building (reminding us of the barriers and prisons of the apartheid state). There are many vertical lines in the painting: the falling dove (usually a sign of peace), the cypress trees and the drinker's long body. The viewer's attention is drawn downwards to the second dead bird on the ground. This memento mori enlists the viewer to reflect on the artist's sense of hopelessness about his own life and the society he lived in.

Page studied at the Port Elizabeth School of Art under Jack Heath. He first began exhibiting his work in 1948. Members of my family were Fred Page's first patrons. He was a reclusive softly spoken man who never sought the limelight. He lived most of his life in abject poverty. Today he is a highly venerated South African artist.

Text and image supplied by Judy Rubinsztein (née Kerbel).

Image reproduced by kind permission of the Nelson Mandela Metropolitan Art Museum, Port Elizabeth, South Africa.

We are always looking for interesting and visually appealing images for the cover of the *Journal* and would welcome suggestions or pictures, which should be sent to Dr Allan Beveridge, British Journal of Psychiatry, 17 Belgrave Square, London SW1X 8PG, UK or [bjprcpsych.ac.uk](mailto:bjprcpsych.ac.uk).

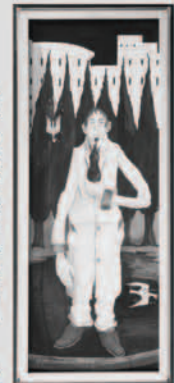

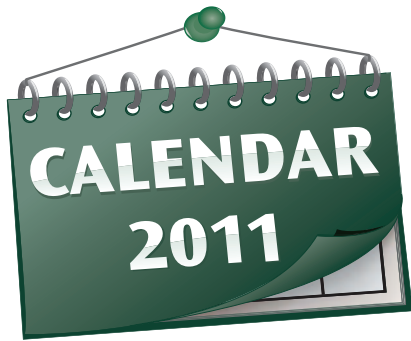

*For free listing of your organization's official annual or regional meeting, please send us the following information: sponsor, location, inclusive dates, type and number of continuing education credits (if available), and the name, address, and telephone number of the person or group to contact for more information. In order for an event to appear in our listing, all notices and changes must be received at least 6 months in advance of the meeting and should be addressed to:*

*Calendar, American Journal of Psychiatry, 1000 Wilson Boulevard, Suite 1825, Arlington, VA 22209-3901, [swstrate@psych.org](mailto:swstrate@psych.org) (e-mail).*

*Because of space limitations, only listings of meetings of the greatest interest to Journal readers will be included.*

---

## MAY

**May 12–14**, 55th Annual Meeting of the American Academy of Psychoanalysis and Dynamic Psychiatry. Contact: AAPDP Executive Office, P.O. Box 30, Bloomfield, CT 06002; (888) 691-8281 (tel), (860) 286-0787 (fax), [info@aapdp.org](mailto:info@aapdp.org) (e-mail), [www.aapdp.org](http://www.aapdp.org) (web site).

**May 14–19**, 164th Annual Meeting of the American Psychiatric Association, Honolulu, HI. Contact: Cathy Nash, APA Annual Meetings Dept., 1000 Wilson Blvd., Ste. 1825, Arlington, VA 22209; (703) 907-7822.

**May 26–29**, 3rd International Congress on ADHD – From Childhood to Adult Disease, Berlin, Germany. Contact: Congress and Exhibition Office: CPO HANSER SERVICE, 011-49-40-670 88 20 (tel), [www.adhd-congress.org](http://www.adhd-congress.org) (web site), [adhd2011@cpo-hanser.de](mailto:adhd2011@cpo-hanser.de) (e-mail).

---

## OCTOBER

**October 5–8**, II International Congress, Dual Disorders, Addictive Behaviors and other Mental Disorders, Barcelona, Spain. Contact: SEPD, [www.cipd2011.com](http://www.cipd2011.com) (web site).

**October 18–23**, 58th Annual Meeting of the American Academy of Child and Adolescent Psychiatry, Toronto, Ontario. Contact: AACAP, 3615 Wisconsin Avenue, N.W., Washington, DC 20016-3007; (202) 966-7300 (tel), (202) 966-2891 (fax), [meetings@aacap.org](mailto:meetings@aacap.org) (e-mail), [www.aacap.org](http://www.aacap.org) (web site).

**October 27–30**, 63rd Institute on Psychiatric Services, American Psychiatric Association, San Francisco, CA. Contact: Jill Gruber, APA Annual Meetings Dept., 1000 Wilson Blvd., Ste. 1825, Arlington, VA 22209; (703) 907-7815.

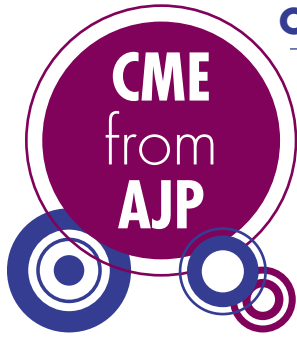

## Continuing Medical Education

Three articles in this issue form the basis of a short course with questions that can be answered for up to 1 *AMA PRA Category 1 Credit™* each by visiting <http://cme.psychiatryonline.org/> and clicking on "American Journal of Psychiatry CME."

CME credit is issued only online, and a paid subscription to the AJP CME course program is required.

This month's courses appear on pages 559-562.

**FREE AUDIO!**

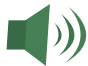

## Have You Heard?

You can listen to highlights of *The American Journal of Psychiatry* by downloading a monthly free .mp3 audio file from our web site (<http://ajp.psychiatryonline.org/misc/audio.dtl>) or by subscribing to the AJP Audio podcast at iTunes or other feed reader (e.g., NewzCrawler, FeedDemon, Bloglines, Google Reader). Presented by Deputy Editor Dr. Susan Schultz or by Editorial Director Michael Roy, each month's audio lasts approximately 30 minutes and covers several research articles, the Treatment in Psychiatry feature, and one or two editorials.

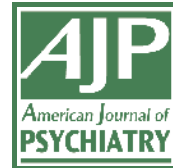

Coming in the June 2011 issue\*

## THE AMERICAN JOURNAL OF PSYCHIATRY

### Interpersonal Psychotherapy for Depression: A Meta-Analysis

P. Cuijpers, A.S. Geraedts, P. van Oppen, G. Andersson, J.C. Markowitz, and A. van Straten

### Children of Depressed Mothers 1 Year After Remission of Maternal Depression: Findings From the STAR\*D-Child Study

P. Wickramaratne, M.J. Gameroff, D.J. Pilowsky, C.W. Hughes, J. Garber, E. Malloy, C. King, G. Cerda, A.B. Sood, J.E. Alpert, M.H. Trivedi, M. Fava, A.J. Rush, S. Wisniewski, and M.M. Weissman

### A Nationwide Cohort Study of Oral and Depot Antipsychotics After First Hospitalization for Schizophrenia

J. Tiihonen, J. Haukka, M. Taylor, P.M. Haddad, M.X. Patel, and P. Korhonen

### Effects of Stress on Decision-Making Deficits in Formerly Heroin-Dependent Patients After Different Durations of Abstinence

X. Zhang, J. Shi, L. Zhao, L. Sun, J. Wang, G. Wang, D.H. Epstein, and L. Lu

\*Can't wait? Visit [ajp.psychiatryonline.org](http://ajp.psychiatryonline.org) and click the "AJP in Advance" logo to see all articles uploaded in advance of print!
